# Supplementary material
Source: MDPI journal article supplement (https://www.mdpi.com/2072-4292/15/7/1929)
Supplement: s1 [file s1]

## Supplementing Information

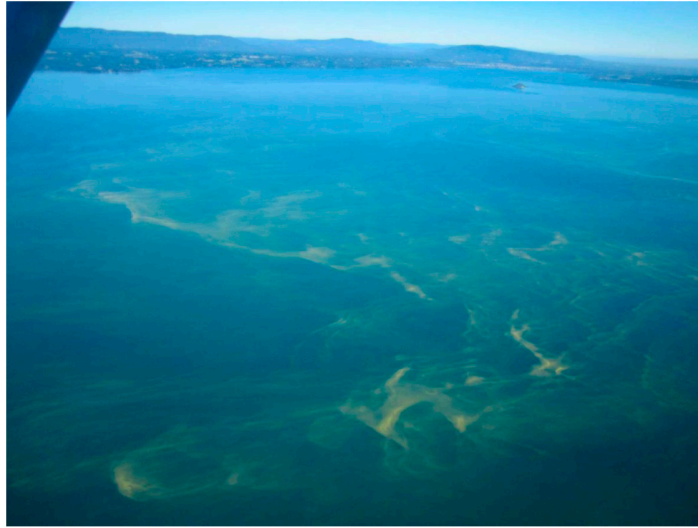

Figure S1. Ninth bloom reported in Villarrica by Vigilantes del Lago (January 19, 2015, *Dolichospermum* sp.) Sector Centro.

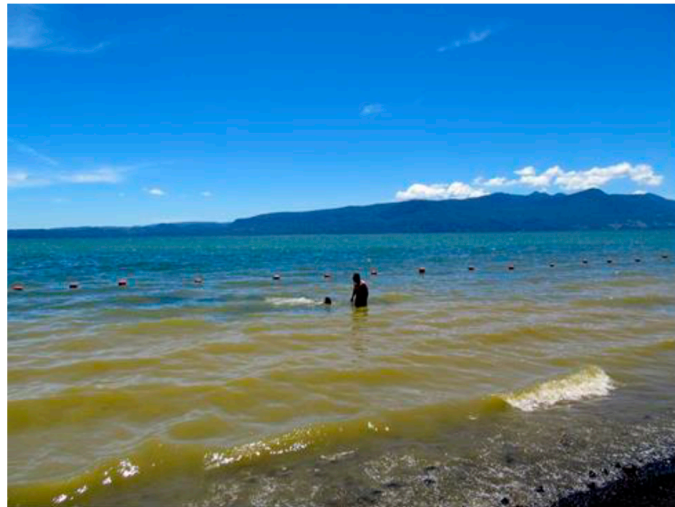

Figura S2. Tenth bloom reported in Villarrica (January 2, 2016, *Dolichospermum* sp.) Ribera Sur.

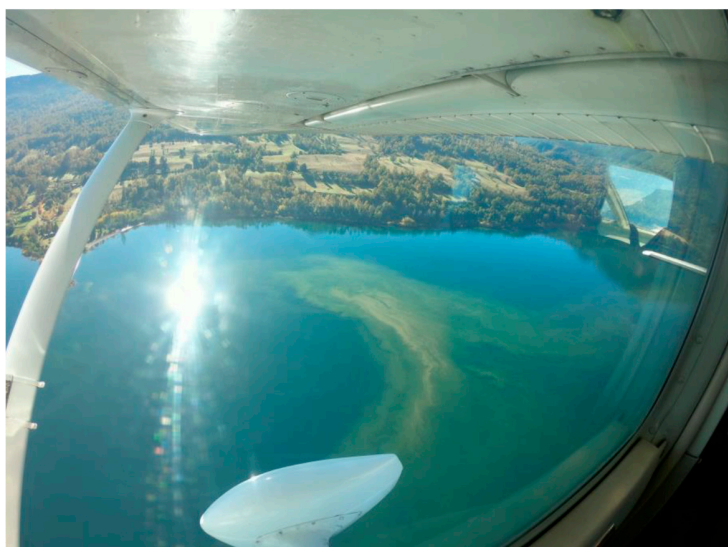

Figure S3. Eleventh bloom reported in Villarrica (February 10, 2017, *Spirogyra* sp.) South Bank.

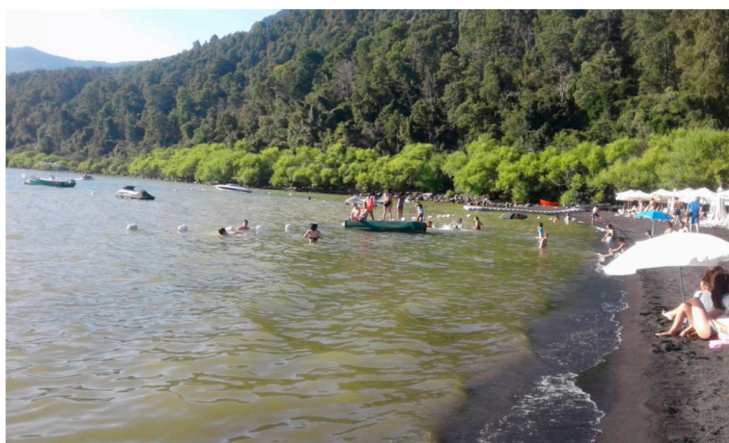

Figure S4. Twelfth bloom reported in Villarrica (January 25, 2018, *Dolichospermum* sp.) South Sector

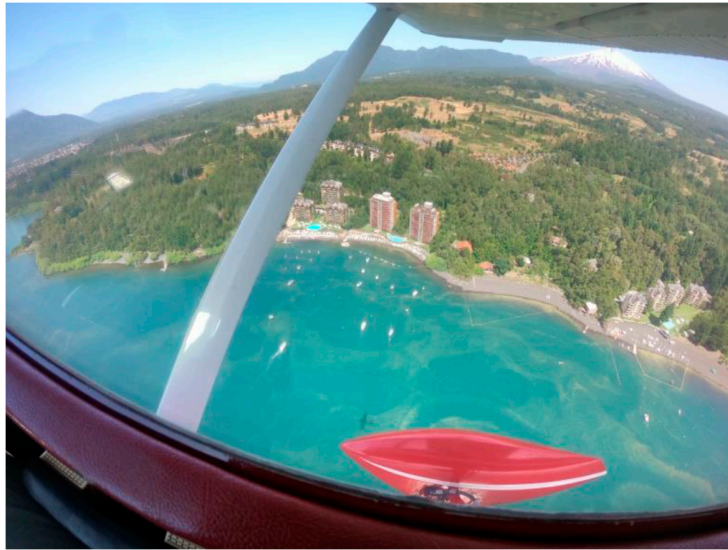

Figure S5. Last Bloom reported in Villarrica (Jan. 19, 2020, *Dolichospermum* sp.) Pelagial Villarrica
